# Supplementary material
Source: PubMed Central journal article supplement (PMC6515837)
Supplement: jamaneurol-76-571-s002.pdf [file jamaneurol-76-571-s002.pdf]

1 **Statistical analysis plan for the trial:**

2  
3 **Hypothermia in addition to decompressive hemicraniectomy in malignant MCA**  
4 **stroke: a randomized clinical trial**

5  
6  
7 Hermann Neugebauer<sup>1</sup>, MD; Hauke Schneider<sup>2</sup>, MD, MBA; Julian Bösel<sup>3</sup>, MD; Carsten Hobohm<sup>4</sup>, MD;  
8 Sven Poli<sup>5</sup>, MD; Rainer Kollmar<sup>6</sup>, MD; Jan Sobesky<sup>7</sup>, MD; Stefan Wolf<sup>8</sup>, MD; Miriam Bauer<sup>9</sup>; Sascha  
9 Tittel<sup>10</sup>; Jan Beyersmann<sup>10</sup>; Johannes Woitzik<sup>8</sup>, MD; Peter U. Heuschmann<sup>11</sup>, MD; and Eric Jüttler<sup>12</sup>,  
10 MD; for the IGNITE Study Group

11  
12 <sup>1</sup> Department of Neurology, RKU – University and Rehabilitation Hospitals Ulm, University of Ulm,  
13 Germany

14 <sup>2</sup> Department of Neurology, University Hospital, Technische Universität Dresden, Germany; and De-  
15 partment of Neurology, Universitätsklinikum Augsburg, Augsburg, Germany

16 <sup>3</sup> Department of Neurology, University of Heidelberg, Heidelberg, Germany; and Department of Neu-  
17 rology, Klinikum Kassel, Germany

18 <sup>4</sup> Department of Neurology, University of Leipzig, Leipzig, Germany; and Klinikum Saalekreis, Merse-  
19 burg, Germany

20 <sup>5</sup> Department of Neurology, University of Tübingen, Germany

21 <sup>6</sup> Department of Neurology, University of Erlangen, Erlangen, Germany; and Department of Neurology  
22 and Neurointensive Care, Klinikum Darmstadt, Germany

23 <sup>7</sup> Department of Neurology and Center for Stroke Research Berlin, Charité – Universitätsmedizin Ber-  
24 lin, Germany; and Department of Neurology, Johanna-Etienne-Krankenhaus Neuss, Neuss, Germany

25 <sup>8</sup> Department of Neurosurgery, Charité – Universitätsmedizin Berlin, Germany

26 <sup>9</sup> Center for Stroke Research Berlin, Charité – Universitätsmedizin Berlin, Germany

27 <sup>10</sup> Institute of Statistics, University of Ulm, Germany

28 <sup>11</sup> Institute for Clinical Epidemiology and Biometry, Comprehensive Heart Failure Centre, University of  
29 Würzburg; Clinical Trial Center, University Hospital Würzburg, Germany

30 <sup>12</sup> Department of Neurology, Kliniken Ostalb, Ostalb-Klinikum Aalen, Germany

31  
32  
33

34 **Preface**

35

36 The present trial was planned in 2010. Peter Heuschmann was consulted for methodology during the  
37 planning phase. Sascha Tittel conducted the statistical analysis under direction and supervision of Jan  
38 Beyersmann. The statistical analysis was approved as a master's thesis from the University of Ulm,  
39 Faculty for Mathematics and Economics, Institute of Statistics.<sup>1</sup>

40

41 The preliminary statistical analysis plan was drafted during planning and beginning of the study and  
42 finalized after early stopping of the trial for safety reasons.

43

44 The first part of the present document is a summary of the statistical analysis plan. The second part of  
45 the document quotes verbatim (without quotation marks) from the master thesis considering definitions,  
46 data and study design, definition of data sets, statistical test and models and the statistical analysis.<sup>1</sup>

47

48

49

50

51

52 **First Part: Summary of statistical analysis plan.**

53

54 **Introduction**

55 In patients with space-occupying middle cerebral artery (MCA) infarction therapeutic hypothermia (TH)  
56 has been suggested additionally to decompressive hemicraniectomy (DHC). However, no sufficient  
57 evidence for the benefit of TH was available. Therefore, our objective was to conduct a trial to examine  
58 mortality and safety for patients that received TH in addition to DHC.

59

60 **Study Methods**

61 **Trial design**

62 The DEPTH-SOS trial is a multicentre, randomized controlled trial in six German academic centres to  
63 evaluate the effect of hypothermia (32-34°C, >72h) in addition to (DHC) (<48h) in adult MCA stroke  
64 patients (18 – 60 years) on mortality at day 14 after DHC (primary endpoint). Additionally, safety  
65 measures at day 14 and at 12 months, and functional parameters and mortality at 12 months are ana-  
66 lyzed.

67

68 **Randomization**

69 Randomization is computer generated in blocks and stratified for centers using a web-based system  
70 ([www.randomizer.at](http://www.randomizer.at)). Patients are assigned in a 1:1 ratio to either hemicraniectomy (control group) or  
71 hemicraniectomy plus therapeutic hypothermia (hypothermia group). The trial has an open-label de-  
72 sign. Blinded rater obtains follow-up-information after 12 months using a structured telephone inter-  
73 view. An independent institute of statistics analyzes the data.

74

75 **Sample size**

76 Sample size is to be 324 patients. For the calculation see the study protocol.<sup>2</sup>

77

78 **Statistical interim analyses and stopping guidance**

79 Safety analyses of all SAEs are planned after the inclusion of every 10<sup>th</sup> patient. Interim analysis of the  
80 primary endpoint is planned after treatment of 50 patients. Based on the results of the safety and inter-  
81 im analyses, an independent Data Safety and Monitoring Board that was not involved in the planning  
82 or conduction of the trial, recommends to continue or to stop the trial. For the interim analyses the  
83 concept of group-sequential tests for two proportions with two repeated significance tests is to be  
84 used. The alpha-spending function by Pocock is applied to be able to react quickly on possible differ-  
85 ences in mortality between treatment groups.

86

87 **Timing of final analysis**

88 The final analysis is to be conducted when all patients have reached their respective 1-year follow-up.

89

90 **Timing of outcome assessments**

91 Mortality is measured when a patient dies, adverse events are measured when they occur. Pneu-  
92 monia is not accounted as SAE but as AE of special interest and is assessed after 14 days. The level

93 of consciousness on the National Institutes of Health Stroke Scale (NIHSS) is measured at hospitaliza-  
94 tion, before operation, and at hospital dismissal. The modified Rankin scale (mRS) score is measured  
95 at hospital dismissal and after 1 year for the follow-up analysis. The Glasgow Coma Scale (GCS)  
96 score is assessed after 14 days. The Barthel index is measured after 1 year. Retrospective consent to  
97 the respective treatment is assessed after 1 year from patients that are still alive, or relatives if the  
98 patient is not responsive or deceased.  
99 Daily assessments include body temperature, intracranial pressure, CTs and MRIs y/n, pO2 value,  
100 medication y/n, osmotherapy y/n, and therapeutic ventilation y/n.

101

## 102 **Statistical Principles**

### 103 **Confidence intervals and P values**

104 The level of statistical significance is 5% for all analyses. There are no adjustments for multiple testing.  
105 Confidence intervals are at a 95% level, calculated via binomial distribution for dichotomous outcomes.  
106 Confidence intervals for ORs are calculated using Fisher's exact test. For recurring events and inci-  
107 dence rates log-transformed confidence intervals are calculated.

108

### 109 **Analysis populations**

110 The analysis is performed as intention-to-treat, with the crossover patients treated as having received  
111 TH. Additionally, a per-protocol analysis is performed for the outcome of mortality and SAEs after 14  
112 days, excluding the crossover patients. For the same outcome as in the PP analysis, an as-treated  
113 analysis is performed additionally.

114

## 115 **Trial Population**

### 116 **Eligibility**

117 Patients with space-occupying MCA infarction were eligible for the trial, if they were to receive early  
118 DHC within 48h of symptom onset. Additionally, the following criteria had to be met:

- 119 • Age between 18 and 60,
- 120 • clinical sign of unilateral MCA infarction
- 121 • severe stroke, indicated by an NIHSS score of  $\geq 15$  if the non-dominant hemisphere was affected  
122 or a score of  $\geq 20$  if the dominant hemisphere was affected,
- 123 • impaired consciousness, indicated by NIHSS item 1a  $\geq 1$ ,
- 124 • unilateral ischemia of at least 2/3 of the MCA territory, confirmed by CT or MRI; basal ganglia had  
125 to be at least partially involved,
- 126 • decision for DHC by treating physicians,
- 127 • possibility to begin DHC within 48h of symptom onset,
- 128 • possibility to start TH within 12h after DHC,
- 129 • written informed consent by patient or legal representative.

130 Exclusion criteria were any of the following:

- 131 • Premorbid mRS score  $\geq 2$  and/or Barthel Index  $< 95$ ,

- 132 • simultaneous other brain lesions, e.g., traumatic brain injury, infarction (contralateral or
- 133 infratentorial) in addition tot he index-infarction,
- 134 • clinical signs of transtentorial herniation,
- 135 • deep coma, indicated by a Glasgow Coma Scale (GCS) score<6 (does not apply to intubated
- 136 patients),
- 137 • secondary hemorrhage in infarction area with space-occupying effect (PH2),
- 138 • known systemic bleeding or coagulation disorders
- 139 • known contraindication for TH, e.g., vasospastic disease, hematological disease with increased
- 140 risk of thrombosis, paramyotonia congenita, severe pre-existing cardiac/liver/kidney disease,
- 141 • known indications for TH, e.g., after cardiopulmonary resuscitation,
- 142 • pregnancy,
- 143 • life expectancy of less than 3 years,
- 144 • sepsis,
- 145 • end-stage malignant disease,
- 146 • participation in other interventional trials.

147

## 148 Recruitment

149 Study flowchart:

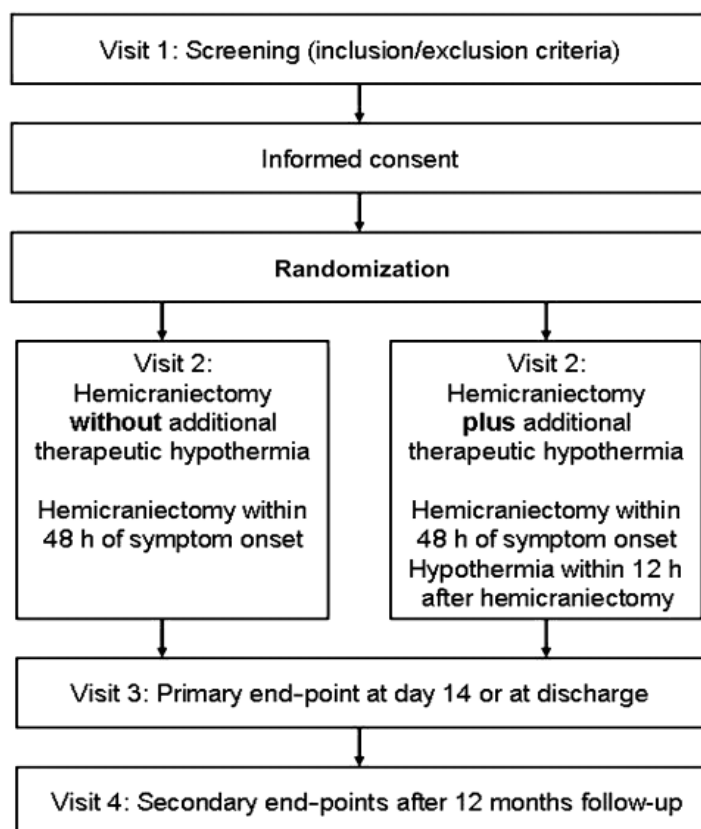

150

151 For further recruitment information see study protocol.<sup>1</sup>

152

153 **Withdrawal/follow-up**

154 A blinded rater performs follow-up after 12 months using a structured telephone interview. Patients lost  
155 to follow-up are excluded from the analyses of the 12-month outcomes.

156

157 **Baseline patient characteristics**

158 Following characteristics of the study population are assessed at baseline:

- 159 • age in years (median, range)
- 160 • sex (no., %)
- 161 • mRS on admission (no., %)
- 162 • pre-existing Barthel Index on admission (median, range)
- 163 • the site of infarction (no., %)
- 164 • stroke in dominant hemisphere y/n (no., %)
- 165 • GCS (median, range; assessible in: no., %;)
- 166 • NIHSS total score on admission (median, range; assessible in: no., %;)
- 167 • time from onset of symptoms to randomization in hours (median, range)
- 168 • time from onset of symptoms to hemicraniectomy in hours (median, range)
- 169 • time from onset of symptoms to hypothermia in hours (median, range)
- 170 • adherence to assigned treatment (no., %)
- 171 • risk factors (arterial hypertension, diabetes, hyperlipidemia, present smoking, atrial fibrillation; no.,  
172 %)
- 173 • rt-PA treatment (no., %)
- 174 • Onset to rt-PA i.v. in minutes (mean, standard deviation)
- 175 • Onset to rt-PA i.a. in minutes (mean, standard deviation)
- 176 • Onset to rt-PA m.R. in minutes (mean, standard deviation)

177

178 **Analysis**

179 **Primery outcome**

180 Primary (dichotomous) outcome is mortality after 14 days. The date of death is calculated as differ-  
181 ence of day of death and day of admission in days.

182

183 **Safety outcome**

184 SAEs are classified as having at least one of the following:

- 185 • Blood and lymphatic system disorders
- 186 • Cardiac disorders
- 187 • Gastrointestinal disorders
- 188 • General disorders and administration site conditions
- 189 • Infections and infestations

- 190 • Injury, poisoning and procedural complications
- 191 • Investigations
- 192 • Metabolism and nutrition disorders
- 193 • Musculoskeletal and connective tissue disorders
- 194 • Nervous system disorders
- 195 • Psychiatric disorders
- 196 • Renal and urinary disorders
- 197 • Respiratory, thoracic and mediastinal disorders
- 198 • Skin and subcutaneous tissue disorders
- 199 • Surgical and medical procedures
- 200 • Vascular disorders

201

202 Body temperature is measured in °C and presented as mean per day. The intracranial pressure is  
203 measured in mmHg, presented as mean per day and classified critical if > 20 mmHg for a period long-  
204 er than 10 minutes. Target temperature of TH was 33.0±1.0°C.

205 Pneumonia is rated as adverse event, not as SAE, because its rate in intubated ICU patients is report-  
206 ed to be 70% even under normothermia.

207 Scores on the modified Rankin scale range from 0 to 6, with 0 indicating no symptoms, 1 no substan-  
208 tial disability despite the presence of symptoms, 2 slight disability, 3 moderate disability necessitating  
209 some help, 4 moderately severe disability, and 5 severe disability; a score of 6 indicates death. Per-  
210 sons with a score of 0, 1, or 2 are considered to be functionally independent.

211 Scores on the Barthel index range from 0 (complete dependence) to 100 (independence) in incre-  
212 ments of 5.

213 Scores on the Glasgow Coma Scale range from 3 to 15, with lower scores indicating reduced  
214 levels of consciousness.

215 Scores on the National Institutes of Health Stroke Scale (NIHSS) range from 0 to 42, with higher  
216 scores indicating more severe neurologic impairment.

217

## 218 **Analysis methods**

219 For mortality and safety endpoints after 14 days, binomial estimates with exact 95% CIs are calculat-  
220 ed, as well as ORs with 95% CIs using Fisher's exact test. For sensitivity analysis, p-values of the  $\chi^2$ -  
221 test are calculated additionally. For the safety outcomes we do not account for recurring events, but  
222 only consider the first event per patient. Pneumonia is analyzed analogously to the primary endpoint.  
223 Incidence rates for SAEs are calculated with 95% log-transformed CIs. The time from onset of symp-  
224 toms to DHC is also log-transformed and compared with the t-test. Ventilation times are compared via  
225 Cox regression and log-rank test for the competing risk endpoints „end of ventilation“ and „death under  
226 ventilation“. The duration of intensive care treatment is also analyzed using log-rank test and Cox re-  
227 gression with combined endpoint „end of stay in intensive care“ (dead or alive). For recurring events like  
228 days in intensive care with medication, number of CTs/MRIs, days with ventilation, days with osmo-

229 therapy, incidence rates with 95% log-transformed CIs are calculated, and Cox' proportional hazards  
 230 model for competing risks (AE vs. Death w/o AE) are used. For functional outcomes NIHHS after 14  
 231 days, GCS after 14 days Wilcoxon's rank sum test for group comparisons are used. A shift analysis is  
 232 conducted for mRS scores after 12 months.

233

234 **Missing data**

235 Patients that are lost to follow-up are completely excluded from the analyses of the 12 month end-  
 236 points. Patients with missing data concerning functional scores are excluded from the respective anal-  
 237 yses. Patients with missing data in incidence rate analysis for day 14 are censored at the first day  
 238 without respective entry.

239

240 **CONSORT flow-chart**

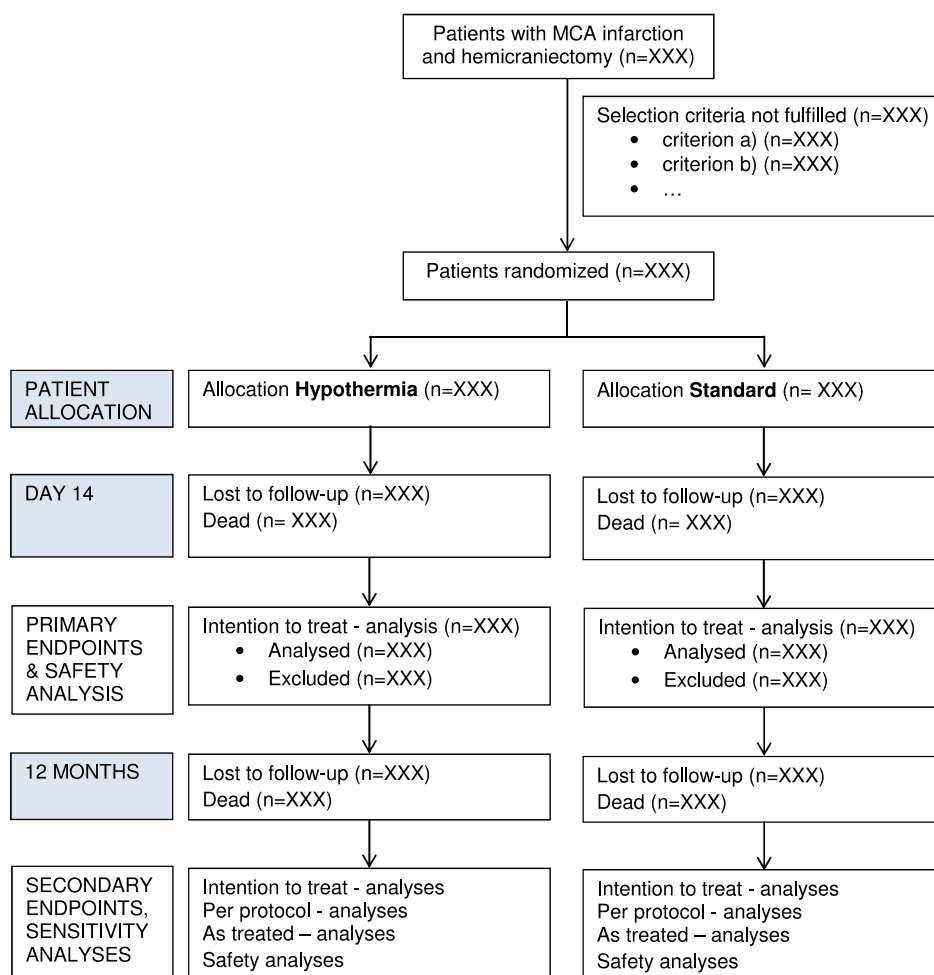

241

242

243 **Statistical software**

244 Stastical analysis is performed using RStudio, Version 1.1.423.<sup>4</sup>

245

246 **Trial registration**

247 [www.drks.de](http://www.drks.de), Identifier DRKS00000623; URL:

248 [https://www.drks.de/drks\\_web/navigate.do?navigationId=trial.HTML&TRIAL\\_ID=DRKS00000623b](https://www.drks.de/drks_web/navigate.do?navigationId=trial.HTML&TRIAL_ID=DRKS00000623b)



249 **Second Part: Statistical analysis plan - excerpts from the master's thesis.**<sup>1</sup>

250

251 **Abbreviations**

|     |           |                                                                  |
|-----|-----------|------------------------------------------------------------------|
| 252 | AE        | Adverse Event                                                    |
| 253 | BI        | Barthel Index                                                    |
| 254 | CI        | Confidence Interval                                              |
| 255 | CT        | Computed Tomography                                              |
| 256 | DEPTH-SOS | DEcompressive surgery Plus hypoTHERmia in Space Occupying Stroke |
| 257 | DHC       | Decompressive Hemicraniectomy                                    |
| 258 | d14       | Day 14 after inclusion into study (since randomization)          |
| 259 | FU        | Follow-Up                                                        |
| 260 | GCP       | Good Clinical Practice                                           |
| 261 | GCS       | Glasgow Coma Scale                                               |
| 262 | ICP       | Intracranial Pressure                                            |
| 263 | IQR       | Interquartile Range                                              |
| 264 | IR        | Incidence Rate or Incidence Density Rate                         |
| 265 | ITT       | Intention To Treat                                               |
| 266 | log       | Logarithm                                                        |
| 267 | MCA       | Middle Cerebral Artery                                           |
| 268 | MRI       | Magnetic Resonance Imaging                                       |
| 269 | mRS       | modified Rankin Scale                                            |
| 270 | NIHSS     | National Institutes of Health Stroke Scale                       |
| 271 | OR        | Odds Ratio                                                       |
| 272 | PP        | Per Protocol                                                     |
| 273 | QOL       | Quality Of Life                                                  |
| 274 | RCT       | Randomized Controlled Trial                                      |
| 275 | SAE       | Serious Adverse Event                                            |
| 276 | TH        | Therapeutic Hypothermia                                          |
| 277 | 12mo      | 12 months after inclusion into study                             |

278

279 **Definitions**

- 280 • Adverse Event
- 281 By §3 (6) GCP-V: Any untoward event in a trial subject administered an investigational medicinal
- 282 product and which does not necessarily have a causal relationship with this treatment.
- 283 • Serious Adverse Event
- 284 By §3 (8) GCP-V: Untoward medical event that
- 285 ○ is life-threatening or leads to death of a patient,
- 286 ○ leads to or prolongs hospitalization,
- 287 ○ causes permanent severe physical or psychological damage.
- 288 • Hazard

289 The hazard  $\alpha_i(t)$  of the patient  $i$  regarding a specific event to the time point  $t$  is the conditional  
290 probability of the event happening within a very small time step, given prior survival and given that  
291 the patient is being observed just before  $t$ . Let  $T \in (0, E)$  be an event time, where  $E$  denotes the  
292 end of observation. Then, the hazard of a patient is formally defined as follows:

$$\alpha_i(t) = \lim_{\Delta t \rightarrow 0} \frac{\mathbb{P}(T \in [t, t + \Delta t) | T \geq t)}{\Delta t}.$$

293 • GCS

294 The Glasgow Coma Scale (GCS) indicates the severity of an impairment of consciousness in  
295 response to defined stimuli. It is evaluated through three different tasks that a patient should  
296 accomplish: eye opening, verbal and motor response. The scale ranges from 3 (comatose or  
297 dead) to 15 (no impairment of consciousness).

298 • NIHSS

299 The National Institutes of Health Stroke Scale (NIHSS) is a scale to evaluate the impairment  
300 caused by a stroke. The scale ranges from 0 to 42, where higher scores indicate more severe  
301 strokes. The max. score of 42 is assigned to deceased patients.

302 • mRS

303 The modified Rankin Scale (mRS) is a tool used to measure disability after strokes. The score  
304 ranges from 0 (perfectly healthy) to 6 (death as a consequence of the stroke).

305 • BI

306 The Barthel Index (BI) is a tool for the assessment of the autonomy of a patient, i.e., the ability to  
307 eat, walk and take care of personal hygiene autonomously. It does not assess the ability to live  
308 alone, because aspects like cooking, homemaking and social aspects are not considered. The  
309 scale ranges from 0 to 100, with higher scores relating to higher autonomy.

310 • p-value

311 The p-value is interpreted as the conditional probability of an observation given that the null  
312 hypothesis is true.<sup>4</sup> Therefore the null hypothesis is dismissed at level  $(1 - \alpha)$ , if the p-value of the  
313 corresponding statistical test is less than or equal to  $\alpha$ . This means, with a maximum probability of  
314  $\alpha \cdot 100\%$  we hold on to the null, even if it is false. Formally, for a test statistic  $T$ , the calculated  
315 value  $t$  of the test statistic and the null hypothesis  $H_0$ , the p-value is given by

$$p = \mathbb{P}(T \geq t | H_0),$$

316 which yields a connection to the significance level  $\alpha$ . Let  $c$  be the the critical value, for which

$$\alpha = \mathbb{P}(T \geq c | H_0)$$

317 holds. Comparing both equations, it holds that

$$p < \alpha \Leftrightarrow t > c.$$

318 This means, the null is dismissed if and only if the calculated test statistic  $t$  is greater than the criti  
319 cal level  $c$ .

320

## 321 Data and Study Design

322 The DEPTH-SOS trial is a prospective, multicenter, open randomized controlled clinical trial (RCT) to  
323 evaluate the effectiveness of therapeutic hypothermia additionally to the standard therapy, which is the  
324 operative removal of a part of the skull, after a malignant middle cerebral artery infarction (most

325 severe, life-threatening stroke). The main question was, if additional TH could decrease mortality in  
326 stroke patients. The duration of the TH will be at least 72 hours with a target temperature of  $33 \pm 1^\circ\text{C}$ ,  
327 starting early within 12 hours after surgery.

328 According to sample size estimation and an expected absolute therapy effect of  $12\% \cdot 2 \cdot 162 = 324$   
329 patients were included and assigned to the groups in a 1:1 ratio. The randomization of the patients  
330 has been executed through permuted blocks of 6 patients each. Patients had to be between 18 and 60  
331 years to be included in the trial. Patients with a preexisting disability (score higher than 1 on the  
332 modified Rankin Scale (mRS)) or a preexisting impairment of daily activities (score below 95 on the  
333 Barthel Index (BI)) were excluded from the trial. Another exclusion criterion was a score of less than 6  
334 on the Glasgow Coma Scale (GCS), indicating a deep coma.

335 From 2011 to 2015 50 patients (24 randomized to the control group, 26 randomized to the hypothermia  
336 group) from 6 centres throughout Germany were included. The study was advised to be stopped by  
337 the Data Safety and Monitoring Board in September 2015 for safety reasons. For the first interim  
338 analysis, planned after 50 patients, possible differences between treatment groups were to be  
339 indicated by Pocock's alpha-spending function. The interim analysis was cancelled due to the  
340 premature end of the study, instead the final analysis was conducted.

341 The primary endpoint was the mortality and safety analysis at d14 within the intention-to-treat (ITT)  
342 population. Since there were two crossover patients in the already small population, a per-protocol  
343 (PP) analysis of the primary and safety endpoints at day 14 was also conducted, with the data  
344 consisting of 48 patients (24 in control, 24 in hypothermia). Finally, an as-treated analysis was  
345 conducted, where the crossover patients were put in the control group for group sizes 26 (control) and  
346 24 (hypothermia).

347

## 348 **Methods**

### 349 **Outline**

350 This chapter gives a comprehensive overview of the used methods. First the methods used for the d14  
351 analyses are introduced along with the estimators followed by the statistical tests. Methods are  
352 introduced in the following order: Odds Ratio, incidence rate, Nelson-Aalen estimator, robust variance  
353 estimation, empirical cumulative distribution function along with the median and IQR, binomial  
354 estimates with the binomial test, confidence intervals, logistic regression, Fisher's exact test, the  $\chi^2$ -  
355 test, the t-test, Wilcoxon's rank-sum test, and finally the log-rank test. For the analysis at 12mo and the  
356 other endpoints, sensitivity analyses for the NIHSS and GCS, and the mRS are introduced, and Cox'  
357 proportional hazards model and competing risks conclude this section.

358

### 359 **Data Sets**

360 Since in the randomized groups all known and unknown confounders are equally distributed, the focus  
361 was laid mostly on the ITT data set, i.e., the two crossover patients were included in our analyses and  
362 treated as if they were in their respective original group. Due to the small number of observations,  
363 deliberations about a possible bias from the crossover patients were made, viz. if all SAEs would  
364 have occurred to them, whereas they did not get the hypothermia treatment. Therefore two additional  
365 analyses were conducted. In a second analysis, the PP approach was used for main mortality and

366 safety endpoints, where these two patients were excluded from the analysis to see whether the  
367 exclusion influences any outcome at all. Finally, the as-treated analysis was conducted where the two  
368 crossover patients were added in the control group.

369 The ITT data set has a size of 50 patients, with 26 being in the hypothermia group, and 24 in the  
370 control group. The PP data set has a total of 48 patients, with 24 in each group. The as-treated data  
371 set has 26 in control and 24 in hypothermia.

372

### 373 **Odds Ratio**

374 Since the data used for the Odds Ratio (OR) is binomially distributed, binomial estimates for the  
375 mortality after 14 days were calculated. The OR is a ratio of the odds of the occurrence of an outcome  
376 of interest between both groups. The OR ranges from 0 to 1, where an OR of 1 means that there is no  
377 difference between groups. The higher the value, the higher the odds for the occurrence of the  
378 outcome in the first group. Let  $p_e$  be the probability for a patient in the experimental group to have the  
379 outcome and  $p_c$  be the probability of a patient in the control group. The OR is then defined by

$$OR = \frac{p_e}{1 - p_e} \cdot \frac{1 - p_c}{p_c}.$$

380 When estimating the OR for confidence intervals, binomial estimates for  $p_e, p_c$  were used, instead.

381 This calculation of the OR is valid for large populations. Given small numbers in the 2 by 2 table, the  
382 OR can have a great variance or even be biased. Therefore, another estimator was used that  
383 performs well and is used in the fisher.test function in R for the calculation of the OR: the Conditional  
384 Likelihood Estimator. See the section of Fisher's Exact Test for details.

385

### 386 **Incidence Rate**

387 The Incidence Rate (IR) is a measure for the occurrence of an event in a population. It estimates the  
388 hazard of of an event under the premise that the hazard is constant over time. The event may be one-  
389 time only, like death, or recurring, like medication. For example, the IR can be the sum of SAEs within  
390 the hypothermia or control group, divided by the sum of the patient-days during the observational  
391 period, i.e., from randomization to day 14 or to 12 months. The equation for the Incidence Rate of  
392 group  $i \in \{1,2\}$  with group size  $n_i \in \{24,26\}$  is

$$IR_i(t) = \frac{\sum_{j=1}^{n_i} N_{ij}(t)}{\sum_{j=1}^{n_i} d_{ij}(t)}.$$

393 Then  $N_{ij}(t)$  is the number of events of the  $j$ th patient in group  $i$  to a predefined time point (14 days or  
394 12 months), and  $d_{ij}(t)$  denotes the patient-days of patient  $j$  in group  $i$ . A day with missing data was  
395 not added to the sum of events nor to the patient-days.

396 For recurring events like medication over the first 14 days the IR was used for group comparison. For  
397 the confidence intervals a log-transformation was performed to minimize data variability.

398

### 399 **Nelson-Aalen Estimator**

400 The Nelson-Aalen Estimator (NAE) is defined by

$$\hat{A}(t) = \sum_{u \leq t} \frac{\Delta N(u)}{Y(u)},$$

401 where  $\Delta N(u)$  is the number of observed events in a population at time  $u$  and  $Y(u)$  is the number of  
 402 patients at risk at time  $u$ . The NAE is the sum of the quotient of the number of observed events at  
 403 each time point and the population at risk at each time point. So the NAE estimates the cumulative  
 404 hazard of a patient over time and is therefore used to compare with the observed IR. For the  $(1 - \alpha)$ -  
 405 CIs of the NAE it holds

$$\hat{A}(t) \mp z_{1-\frac{\alpha}{2}} \hat{\sigma}(t),$$

406 since the NAE is approximately normal, where

$$\hat{\sigma}^2(t) = \sum_{u \leq t} \frac{\Delta N(u)}{Y^2(u)}$$

407 is a good estimator for the variance of the NAE.<sup>5</sup>

408

### 409 Robust Variance Estimation

410 Robust variance estimation was applied to the IRs, since the basic estimation of IRs relies on several  
 411 assumptions, such as independent and identically distributed exponential event times, meaning that  
 412 the hazard remains constant over time, which was assumed in the Incidence Rate section. In general,  
 413 that is not plausible. That is why a robust estimator was used for the variance, which remains  
 414 consistent even if the assumptions above do not hold true.<sup>7</sup>

415

### 416 Empirical Cumulative Distribution Function

417 The Empirical Cumulative Distribution Function (ECDF) is a descriptive function that assigns each  
 418 value the proportion of values smaller than or equal to that value. The ECDF shows, e.g., the speed  
 419 and rate at which patients reach the target temperature in the hypothermia group. The proportion of  
 420 patients that reaches the target temperature at all can also be seen. The definition of the ECDF for a  
 421 population of size  $n$  at time  $t$  is given by

$$F_n(t) = \frac{1}{n} \sum_{i=1}^n \mathbf{1}\{x_i \leq t\},$$

422 where  $x_i, i = 1, \dots, n$  is the time of an observation of interest of patient  $i$  and

$$\mathbf{1}\{x_i \leq t\} = \begin{cases} 1, & x_i \leq t \\ 0, & x_i > t \end{cases}$$

423 is the indicator function.

424

### 425 Median and Interquartile Range

426 The median  $m$  of a distribution is the value of a distribution function  $F$  for which holds

$$F(m) \geq \frac{1}{2} \quad \text{and} \quad \lim_{t \rightarrow m} F(t) \leq \frac{1}{2},$$

427 i.e., the median is the value  $m$ , for which the distribution function is at least 0.5 and the left-hand limit  
 428 is smaller than or equal to 0.5. In the case of a non-continuous function like the ECDF, the first value  
 429  $m$ , for which the ECDF exceeds 0.5, is taken. In the case of patients reaching the target temperature,  
 430 the median tells us when 50% of the patients have reached that target temperature. Median was  
 431 chosen over mean, since the median is more robust in case the distribution is not symmetrical. The  
 432 IQR is the range between the first and the third quartile of the distribution function, i. e., the 0.25%  
 433 quantile and the 0.75% quantile.

434

### 435 **Binomial Estimator and the Binomial Test**

436 The binomial estimator is used when looking at proportions in a population or between populations. It  
437 is based on the binomial distribution with point probability

$$f(x) = \binom{n}{x} p^x (1-p)^{n-x},$$

438 where  $p$  is the success probability in one trial, and  $n$  is the number of trials. In our case,  $p$  is the  
439 probability of an event in a population of size  $n$ . The estimator  $\hat{p}$  is then given by the number of events  
440 divided by the size of the population.

441 For large  $n$ , the Central Limit Theorem can be used to approximate the binomial distribution by a  
442 normal distribution with mean  $np$  and variance  $np(1-p)$ . Let us denote with  $x$  the number of observed  
443 events and with  $p_0$  a hypothetical success probability. Then the hypothesis  $H_0: p = p_0$  is tested against  
444 the two-sided alternative  $H_1: p \neq p_0$  using the test statistic

$$T = \frac{x - np_0}{\sqrt{np_0(1-p_0)}},$$

445 which then is approximately standard normal distributed under the null. The null is rejected, if  $T > z_{1-\frac{\alpha}{2}}$ ,

446 where  $z_{1-\frac{\alpha}{2}}$  denotes the  $(1 - \frac{\alpha}{2})$ -quantile of the standard normal distribution. Here,  $\alpha$  is always 0.05, as  
447 is customary.

448

### 449 **Confidence Intervals**

450 A  $(1 - \alpha)$ -Confidence Interval is an interval estimate. An interval for a parameter is said to be a  
451  $(1 - \alpha)$ -CI, if the probability of the parameter being within that interval is at least  $(1 - \alpha) \cdot 100\%$ . Such  
452 intervals are obtained through assumptions on the distribution of a parameter. The test statistic for the  
453 binomial test is approximately standard normal. That means

$$\lim_{n \rightarrow \infty} \mathbb{P}\left(z_{\frac{\alpha}{2}} \leq T \leq z_{1-\frac{\alpha}{2}}\right) = 1 - \alpha,$$

454 from which the asymptotic  $(1 - \alpha)$ -CI for the parameter  $p$  can be derived:

$$\left[ \hat{p} \mp z_{1-\frac{\alpha}{2}} \sqrt{\frac{\hat{p}(1-\hat{p})}{n}} \right].$$

455 Due to the small sample size, exact CIs were used. The `binom.test` in R calculates exact CIs by

456 Clopper and Pearson (1934) using two one-sided tests at  $(\frac{\alpha}{2})$  level. The lower and upper bounds

457  $(p_l, p_u)$  are obtained through the equations

$$\mathbb{P}(X \geq kp_l) = \frac{\alpha}{4} \quad \text{and} \quad \mathbb{P}(X \leq kp_u) = \frac{\alpha}{4}$$

458 respectively, where  $k$  denotes the number of successes.

459

### 460 **Multinomial Logistic Model**

461 For the analysis of the covariates 'age', 'sex', 'stroke severity' and 'time from randomization to  
462 hemicraniectomy in hours', a multinomial logistic model for ordinal and/or nominal variables was used.

463 The variables here were ordinal with the exception of the nominal 'sex'. The goal was to estimate the  
464 probability of a patient to die within 14 days.

465 Denote with  $\pi_i = \mathbb{P}(y_i = 1)$  the probability of patient  $i$  to die within the first 14 days, given his vector of  
 466  $p$  covariates  $x_i$ . Assume the odds of dying being expressed by

$$\log\left(\frac{\pi_i}{1 - \pi_i}\right) = \alpha + x_i'\beta,$$

467 with  $\beta = (\beta_1, \dots, \beta_p)'$ , which gives us the log odds.  $\alpha$  is the log odds of observing a death for a  
 468 covariate vector  $x_i = 0$  and the  $j$ th entry of the vector  $\beta$  is the log odds ratio of death per unit change  
 469 in the  $j$ th covariate.

470 Due to the logarithmic output of the estimated coefficients and CIs in R, all coefficients and CIs were  
 471 rescaled to the OR scale by taking the exponential of these values.

472

### 473 Fisher's Exact Test

474 Fisher's exact test is a method to test on independence between group assignment and the probability  
 475 of a positive outcome. The null hypothesis can be written as  $H_0 : OR = 1$  against  $H_1 : OR \neq 1$ , where  
 476 OR is the Odds Ratio. Fisher's exact test was used for the primary and secondary endpoints, when  
 477 there was a 2 by 2 table available with no null entries. The `fisher.test` in R calculates the p-value  
 478 through the hypergeometric distribution in the 2 by 2 cases. For the two-sided test the pvalue  
 479 is the sum of 'more extreme' entries in the table. That means, it simulates tables, where the entries are  
 480 more extreme than in the observed table and sums up these probabilities to the p-value. The  
 481 distribution function of the hypergeometric distribution is defined by

$$\mathbb{P}(X = k_1) = \frac{\binom{n_1}{k_1} \binom{n_2}{k_2}}{\binom{n_1 + n_2}{k_1 + k_2}},$$

482 where  $k_i$  is the number of events in group  $i$  and the group size  $n_i$ , for  $i = 1, 2$ . Furthermore, denote by  
 483  $k_l$  and  $k_u$  the lowest and highest possible value for  $k_1$ . The p-value is then given by<sup>6</sup>

$$p = \sum_{x=k_l}^{k_u} \mathbf{1}\{\mathbb{P}(X = x) \leq \mathbb{P}(X = k_1)\} \cdot \mathbb{P}(X = x).$$

484 For the calculation of the estimated OR, `fisher.test` uses not the unconditional Maximum Likelihood  
 485 Estimator (MLE) introduced above, but the conditional MLE.

486 For the estimated OR and the limits of the CI the conditional noncentral hypergeometric likelihood is  
 487 introduced,

$$L_c(k_1; OR) = \frac{\binom{n_1}{k_1} \binom{n_2}{k_2} (OR)^{k_1}}{\sum_{i=k_l}^{k_u} \binom{n_1}{i} \binom{n_2}{k_1 + k_2 - i} (OR)^i}.$$

488 From there, the estimator for the OR is derived via conditional MLE. Since there does not exist a closed  
 489 form for the conditional MLE, one must use iterative procedures. The bounds of the CI for the  
 490 estimated OR are then the values  $\widehat{OR}_l$  and  $\widehat{OR}_u$  that satisfy the equations

$$\frac{\alpha}{2} = \sum_{x=k_l}^{k_u} L_c(x; \widehat{OR}_l)$$

$$\frac{\alpha}{2} = \sum_{x=k_l}^{k_1} L_c(x; \widehat{OR}_u).$$

491 Due to the small sample size this exact test was used, the  $\chi^2$ -test results were added as sensitivity  
 492 analysis.

493

494  **$\chi^2$ -test on Independence**

495 The  $\chi^2$ -test on Independence is usually used for large sample sizes, that are too big to evaluate with  
496 conventional methods. For example, the `chisq.test` in R gives a warning, if one cell of the 2 by 2 table  
497 used holds less than 5 observations.

498 The  $\chi^2$ -test was used whenever Fisher's test was used on 2 by 2 tables, i.e., for both group and the  
499 other attribute of interest we have 2 levels. So the degree of freedom for the test statistic is  $(2 - 1) \cdot$   
500  $(2 - 1) = 1$ . Let  $O_{ij}$  be the observed number in cell  $(i, j)$  of the 2 by 2 table. Denote with  $E_{ij}$  the  
501 expected frequency of cell  $(i, j)$ ;  $i, j = 1, 2$  with total sample size  $n$  and  $n_i$  the total number of  
502 observations for attribute  $i$ , and  $n_j$  analogously defined. It holds

$$E_{ij} = \frac{n_i \cdot n_j}{n}.$$

503 The test statistic is then given by

$$\chi^2 = \frac{\sum_{i,j=1}^2 (O_{ij} - E_{ij})^2}{E_{ij}},$$

504 which is approximately  $\chi^2$ -distributed with 1 degree of freedom. Let  $\widehat{\chi^2}$  be the value calculated with the  
505 data. Then the null hypothesis that the attributes are independent is dismissed at level  $\alpha$ , if the p-value  
506  $\mathbb{P}(\chi^2 > \widehat{\chi^2}) \leq \alpha$ , i.e., the probability that the test statistic exceeds the value of the actually calculated  
507 value has to be smaller than the significance level.

508

509 **t-test**

510 The t-test is used to test for differences in mean values between groups. It uses the fact, that the  
511 sample means follow a t-distribution when centered and scaled properly. Denote with  $x_{11}, \dots, x_{1n_1}$  and  
512  $x_{21}, \dots, x_{2n_2}$  the data in two groups. The underlying random variables are assumed to be normally  
513 distributed with  $(\mu_1, \sigma_1^2)$  and  $(\mu_2, \sigma_2^2)$  respectively. The test statistics is given by

$$t = \frac{\bar{x}_2 - \bar{x}_1}{\sqrt{\frac{s_1^2}{n_1} + \frac{s_2^2}{n_2}}},$$

514 which is approximately t-distributed with  $\nu$  degrees of freedom,  $\bar{x}_i$  denotes the arithmetic mean of  
515 group  $i$  and  $s_i$  the group standard deviation in group  $i$ .

516 The test statistic is also called Welch test statistic. It is also the default option of the `t.test` in R (which  
517 was used). It assumes no homogeneity in variances, which is regarded the safer variant instead of  
518 assuming same variances.<sup>3</sup> Then the denominator in the test statistic is different and the degrees of  
519 freedom are integers. The number  $\nu$  of degrees of freedom in the Welch test is calculated by

$$\nu = \frac{\left(\frac{s_1^2}{n_1} + \frac{s_2^2}{n_2}\right)^2}{\frac{1}{n_1 - 1} \left(\frac{s_1^2}{n_1}\right)^2 + \frac{1}{n_2 - 1} \left(\frac{s_2^2}{n_2}\right)^2},$$

520 which is the reason why the degrees of freedom are very often fractions instead of integers. The null  
521 hypothesis  $H_0 : \mu_1 = \mu_2$  is then rejected, if  $t < -t_{\nu, 1-\frac{\alpha}{2}}$  or  $t > t_{\nu, 1-\frac{\alpha}{2}}$ .

522



### 523 **Wilcoxon's Rank-Sum Test**

524 Wilcoxon's rank-sum test is an important non-parametric test based on the ranks of the observed data,  
525 not the data itself. So the underlying distribution does not have to be known. The test is used for  
526 hypotheses on homogeneity of two groups, i.e., if the underlying distributions of two groups are the  
527 same. The test assigns ranks to each observation. Define for the sample size  $n = n_1 + n_2$  (the sum of  
528 both group sizes) and the data  $X = (X_1, \dots, X_n)$  the rank of observation  $i$  as

$$R_i(X) = \sum_{j=1}^n \mathbf{1}\{X_j \leq X_i\}.$$

529 When ties occur in data, mid-ranks defined by

$$\tilde{R}_i(X) = \sum_{j=1}^n \frac{1}{2} (\mathbf{1}\{X_j \leq X_i\} + \mathbf{1}\{X_j < X_i\})$$

530 are calculated. Wilcoxon's rank-sum statistic is given by

$$S_n = \sum_{i=1}^n \tilde{R}_i(X).$$

531 Note that if there are no ties in the data, it holds  $R_i(X) = \tilde{R}_i(X)$ . Wilcoxon's rank-sum test was used as  
532 sensitivity analysis for the two-sample t-test, e.g. the possible group difference in time from onset of  
533 symptoms to DHC.

534

### 535 **Log-rank Test**

536 The log-rank test is widely used to compare two survival curves. The test compares two groups at  
537 each death time and the expected number of deaths proportional to the population at risk at a specific  
538 time.<sup>3</sup> The result is then summed up over all death times and compared with the respective observed  
539 number of deaths.

540 Let  $n_1$  and  $n_2$  be the sizes of two groups we wish to compare at time zero. Denote with  $J$  the number  
541 of event times the first group, and  $a_j, j = 1, \dots, J$  the number of observed events at time  $j$  in the same  
542 group. Let  $m_j$  be the total number of events in both groups at time  $j$ . Then the estimated expected  
543 number of events under the null hypothesis  $H_0 : S_1(t) = S_2(t)$ , i.e., the survival curves  $S_1(t)$  and  $S_2(t)$   
544 are identical, is given by  $n_{1j}m_j/N_j$ , where  $N_j = n_{1j} + n_{2j}$  is the total number of people at time  $j$ . The  
545 test statistic for the log-rank test is defined as

$$X_{LR}^2 = \frac{\left(\sum_{j=1}^J a_j - \frac{n_{1j}m_j}{N_j}\right)^2}{\sum_{j=1}^J \frac{n_{1j}n_{2j}m_j(N_j - m_j)}{N_j^2(N_j - 1)}}$$

546 which is approximately  $\chi^2$ -distributed with 1 degree of freedom.<sup>6</sup> When there are no ties in the event  
547 times, it holds  $m_j = 1$  for  $j = 1, \dots, J$ .

548 The log-rank test is non-parametric, meaning that there is no assumption about the specific distribution  
549 of the data, it is only assumed that both groups have the same survival function. The log-rank test was  
550 used each time where there were survival curves to compare. It also has a connection to Cox'  
551 proportional hazards model, where proportional hazards are assumed, indicating identical survival  
552 functions with the exception of a constant  $\varphi$ , i.e.

$$S_1(t) = S_2(t)^\varphi.$$

553 This is equivalent to

$$\exp(-A_1(t)) = \exp(-\varphi A_2(t)),$$

554 where  $A_i(t)$  is the cumulative hazard function of group  $i$ . Differentiation of the exponents then yields

$$\alpha_1(t) = \varphi \alpha_2(t),$$

555 with  $\alpha_i(t)$  denoting the hazard function of group  $i$ . This means the hazards of both groups are  
 556 proportional to each other, which is the assumption of Cox' model. In the case of  $\varphi = 1$ , it yields the  
 557 log-rank test, where possible differences in survival curves, and therefore hazards, are tested. The  
 558 log-rank test is also connected to the IR, where ratios of occurred events and patient-days are  
 559 calculated.

560

### 561 **Analyses for NIHSS, GCS, BI and the mRS**

562 For the NIHSS and GCS scores two different analyses were conducted, because there is no separate  
 563 coding for deceased patients. In the NIHSS the scale ranges from 0 to 42, where higher scores mean  
 564 more severe strokes. Therefore in the first analysis of the NIHSS score deceased patients were  
 565 excluded. In a second analysis, the sensitivity analysis, the deceased patients were included and  
 566 assigned a score of 42 to not condition on the future, i.e., no assumptions about the life status  
 567 of patients were made.

568 The same approach for the GCS was made, which ranges from 3 to 15, where lower scores indicate  
 569 more severe coma. In the first analysis of this score deceased patients were again excluded, and in  
 570 the second the patients were included and assigned a score of 3.

571 The BI ranges from 0 to 100, where higher scores relate to higher autonomy. Only a descriptive  
 572 analysis was conducted for this score due to missing data.

573 The mRS ranges from 0 to 6, where a higher score indicates a more severe disability following a  
 574 stroke, with 6 being the score for death.

575

### 576 **Cox' Proportional Hazards Model**

577 Cox' proportional hazards model is used for regression of survival data similar to the usual linear or  
 578 logistic regression. It also gives us the estimated hazard ratio between two groups, so we can see if  
 579 there is significant difference in hazards and how strong the difference is. The Cox model assumes  
 580 that both groups have the same baseline hazard  $\alpha_0(t)$  at each time  $t$ . The baseline hazard, which is  
 581 common to all patients, describes an existing hazard when the covariate vector  $x_i$  is zero, i.e., a  
 582 hazard that is present even if no covariates influence the outcome. Then the conditional hazard at time  
 583  $t$  given the  $p$ -dimensional baseline covariate vector  $x_i = (x_{i1}, \dots, x_{ip})$  of patient  $i$  is given by

$$\alpha(t|x_i) = \alpha_0(t) \cdot \exp(\beta' \cdot x_i),$$

584 where  $\beta = (\beta_1, \dots, \beta_p)'$  is the vector of regression coefficients and  $p$  is the number of covariates. This is  
 585 called a semi-parametric model with  $\beta \in \mathbb{R}^p$  being the parametric part, and the baseline hazard  $\alpha_0$  the  
 586 non-parametric part. The unknown baseline hazard cancels out when calculating hazard ratios. This  
 587 model only holds true, if there are no competing risks, i.e., there is no other possible outcome than the  
 588 outcome of interest. For example, when looking at the time of ventilation there are two possible  
 589 endpoints, either 'death while ventilation' or 'end of ventilation without death', those two endpoints are  
 590 the competing risks. Then there is more than one Cox model.

591 Let  $\varepsilon \in \{1,2\}$  be a possible endpoint and let  $T$  be an observed event time, then the cause-specific  
592 hazard function is given by

$$\alpha_{0j}(t) = \lim_{\Delta t \rightarrow 0} \frac{\mathbb{P}(T \in [t, t + \Delta t), \varepsilon = j | T \geq t)}{\Delta t},$$

593 with  $j \in \{1,2\}$ .

594 The coxph function calculates the estimated logarithmic hazard ratio and the actual hazard ratio along  
595 with the confidence interval for the hazard ratio. Additionally, it calculates three statistical tests for the  
596 significance of the HR, the Wald test, the likelihood ratio test, and the score test, which is equivalent to  
597 the log-rank test.<sup>3</sup>

598

## 599 **Statistical Analysis**

### 600 **Data**

601 The DEPTH-SOS trial randomized 50 adult patients up to 60 years to either therapeutic hypothermia  
602 (26 patients, hypothermia group) or standard care (24 patients, control group). Since there were two  
603 crossover patients from the hypothermia group to the control group, an ITT approach was performed  
604 for the first analysis. In a second step, a PP analysis and an as-treated analysis of mortality and  
605 safety were performed.

606 First of all a univariate analysis of the primary endpoint 'Mortality at d14' was performed. Therefore,  
607 only covariates from the baseline data (see Table 4.1) was used as well as for the multivariate  
608 analyses.

609

### 610 **Endpoints**

#### 611 • Primary endpoint

612 The primary endpoint is mortality at d14. It was analyzed dichotomously with a binomial estimate  
613 by group with exact 95% CIs. Exact 95% CIs for the OR using Fisher's test were also computed.

614 Additionally, same method was used to test for independence between mortality and group  
615 membership. In addition,  $\chi^2$ -tests were used as sensitivity analysis to verify the exact results.

616 Then, multivariate analyses were conducted with baseline covariates 'age', 'sex', 'stroke severity',  
617 and 'time from randomization to hemicraniectomy'. The age variable was converted into an  
618 analyzed in decades, meaning the age of each patient was divided by 10. Our method here was  
619 logistic regression with four bivariate models, in which group membership was always included in  
620 addition to one of the baseline variables. Afterwards a model with group membership and all four  
621 baseline variables was set up. Outcome was again mortality at d14.

622 Finally, a multivariate analysis was conducted, where all variables which fulfilled the AKAIKE  
623 criterion (univariate p-value  $\leq 15.7\%$ ) were included. The method of choice was again logistic  
624 regression.

#### 625 • Secondary endpoints at d14

626 ○ Analysis of each (S)AE (P(Patient experiences (S)AE in  $[0,t]$ )). This analysis did not  
627 account for possible recurring events, but only the respectively first (S)AE.

628 ■ Evaluation analogous to primary endpoint, due to  $t=14d$

- 629      ○ Calculation of the incidence rate  $\frac{\sum_{j=1}^{n_i} N_{ij}(t)}{\sum_{j=1}^{n_i} d_{ij}(t)}$ , with log-transformed 95% CIs by group
- 630                      ▪  $N_{ij}(t)$ : All (S)AEs of patient  $j$  in group  $i$  recurring at d14, and  $i = 1,2$
- 631                      ▪  $d_{ij}(t)$ : Total time patient  $j$  of group  $i$  spent in the study to a maximum of 14 days;
- 632                      total time ended with the minimum of death and  $t$  respectively.
- 633                      ▪  $n_i$ : Size of group  $i$
- 634                      ▪ Evaluation at d14 analogous to primary endpoint
- 635      ○ Respective time from onset of symptoms to DHC with log-transformation
- 636                      ▪ t-test for comparison of groups
- 637                      ▪ Wilcoxon's rank-sum test as sensitivity analysis
- 638      ○ Time from begin of TH to target temperature
- 639                      ▪ Empirical distribution function (x-axis: time in days, y-axis: proportion of patients
- 640                      that reached target temperature)
- 641                      ▪ Calculation of median and IQR
- 642                      ▪ There was no comparison between groups, since there was no TH in the control
- 643                      group.
- 644      ○ Total time of TH
- 645                      ▪ Empirical distribution function (x-axis: time in days, y-axis: proportion of patients
- 646                      that reached the end of TH)
- 647                      ▪ Calculation of median and IQR
- 648                      ▪ Again, there was no comparison between groups.
- 649      ○ Temperature load or adherence
- 650                      ▪ Figures of the daily means over the first 14 days
- 651                      ▪ Figures with minimum and maximum by group
- 652      ○ Total time of ventilation
- 653                      ▪ Survival analysis (univariate score test (corresponds to the log-rank test) and Cox
- 654                      regression for all event specific risks (competing risks) with endpoints 'End of
- 655                      ventilation', 'Death while ventilation'), due to competing risks.
- 656      ○ Number of patients with tracheostomy at d14
- 657                      ▪ Evaluation analogous to primary endpoint
- 658      ○ Total time of stay in intensive care
- 659                      ▪ Survival analysis (univariate score-test and Cox regression for combined endpoint
- 660                      'End of stay in intensive care' (alive+leave vs. Death in intensive care) and
- 661                      analysis of competing risks for the endpoints 'End of stay in intensive care alive',
- 662                      'End stay in intensive care dead'), due to competing risks.
- 663
- 664      The following recurring events were analyzed with incidence rates and according
- 665      to the following:
- 666                      ▪ 95% CIs based on log-transformation
- 667                      ▪ Graphical verification of goodness of fit with the Nelson-Aalen estimator
- 668                      ▪ Group comparison with Cox

- 669                   ▪ Log-rank test for group comparison
- 670           ○ Medication while in intensive care
- 671                   ▪ Incidence rate  $\frac{\text{Number of daily doses of catecholamine}}{\text{Number of days (cumulated) patient stayed in intensive care}}$  by group
- 672           ○ Usage of therapeutic ventilation
- 673                   ▪ Incidence rate  $\frac{\text{Number of days with ventilation}}{\text{Number of days (cumulated) patients stayed in intensive care}}$  by group
- 674           ○ Number of CTs and MRIs while hospitalized
- 675                   ▪ Incidence rate  $\frac{\text{Number of CTs and MRIs}}{\text{Number of days (cumulated) patient spent hospitalized}}$  by group
- 676           ○ Osmotherapy
- 677                   ▪ Incidence rate  $\frac{\text{Number of days with osmotherapy}}{\text{Number of days (cumulated) patient stayed in intensive care}}$  by group
- 678   • Secondary endpoints after 12 month FU
- 679           ○ Incidence rate of SAEs  $\frac{\sum_{j=1}^{n_i} N_{ij}(t)}{\sum_{j=1}^{n_i} d_{ij}(t)}$  with log-transformed 95% CIs by group
- 680                   ▪ Evaluation after 12mo analogous at d14 and  $d_{ij}(t)$  maximum 12 months
- 681                   ▪ For all competing risks (AE vs. death without AE) Cox' proportional hazards model
- 682                   was used.
- 683   • Other endpoints
- 684           ○ Stroke severity (NIHSS at d14)
- 685                   ▪ Calculation of the mean was not appropriate due to the ordinal scale (0-42).
- 686                   ▪ The higher the value, the more severe the stroke.
- 687                   ▪ Calculation of the median, IQR and group comparison with Wilcoxon including
- 688                   only living patients
- 689                   ▪ Sensitivity analysis, median, IQR with Wilcoxon; deceased patients were assigned
- 690                   a value of 42 (the maximum) to include all patients in the analysis. Furthermore, it
- 691                   was not conditioned on the future (that the patients were alive at d14).
- 692           ○ Coma severity (GCS at d14)
- 693                   ▪ Calculation of the mean was not appropriate due to the ordinal scale (3-15).
- 694                   ▪ The lower the value, the more severe the coma.
- 695                   ▪ Calculation of the median, IQR and group comparison with Wilcoxon including
- 696                   only living patients
- 697                   ▪ Sensitivity analysis, median, IQR with Wilcoxon; deceased patients were assigned
- 698                   a value of 3 (the minimum) to include all patients in the analysis, analogously to
- 699                   the NIHSS.
- 700           ○ Functional treatment results
- 701                   ▪ The BI was analyzed only descriptively after 12mo due to incomplete data.
- 702                   ▪ mRS
- 703                       • Ordinal scale, no mean
- 704                       • Categorized evaluation with 0-4 good, 5 bad, 6 deceased
- 705                       • Evaluation when leaving the hospital and after 12mo
- 706                       • Median, IQR, Wilcoxon group comparison

- 707
  - Shift analysis after 12mo
- 708
  - Retrospective consent after 12mo
- 709
  - Dichotomous evaluation analogous to primary endpoint
- 710
  - Pneumonia at d14 (AE of special interest)
- 711
  - Analysis analogous to SAEs at d14
- 712
  - Graphical presentation of the ICP during the first 14 days per group
- 713
  - PP analysis of SAEs and mortality
- 714
  - AS-treated analysis of SAEs and mortality
- 715

716 **References**

- 717 [1] Tittel SR. *The Statistical Analysis of the Decompressive surgery Plus hypoThermia for Space Oc-*  
718 *cupying Stroke (DEPTH-SOS) Trial, with a View towards Mortality and Safety.* [master's thesis]. Ulm,  
719 Germany: Ulm University; 2018.
- 720 [2] Neugebauer H, Kollmar R, Niesen WD, et al; DEPTH-SOS Study Group; IGNITE Study Group.  
721 DEcompressive surgery Plus hypoThermia for Space-Occupying Stroke (DEPTH-SOS): a protocol of  
722 a multicenter randomized controlled clinical trial and a literature review. *Int J Stroke.* 2013;8(5):383–  
723 387.
- 724 [3] Dalgaard P. *Introductory Statistics with R.* Second. University of Copenhagen, Denmark: Springer;  
725 2008.
- 726 [4] Dorey F. The p-value: What is it and what does it tell you? *Clinical Orthopaedics and Related*  
727 *Research.* 2010;468(8):2297–2298.
- 728 [5] Klein JP. Small Sample Moments of Some Estimators of the Variance of the Kaplan-Meier and  
729 Nelson-Aalen Estimators. *Scandinavian Journal of Statistics.* 1991;18(4):333–340.
- 730 [6] Lachin JM. *Biostatistical Methods: The Assessment of Relative Risks.* Second. Hoboken, New  
731 Jersey: John Wiley & Sons, Inc.; 2011.
- 732 [7] Scosyrev E. Asymptotically robust variance estimation for person-time incidence rates. *Biom J.*  
733 2016;58(3):474–488.
